# Supplementary material for: Effect of beta glucan coating on controlled release, bioaccessibility, and absorption of β-carotene from loaded liposomes
Source: Royal Society of Chemistry journal article supplement (doi:10.1039/d3fo04123a), 2024-01-01
Supplement: d3fo04123a1.pdf [file d3fo04123a1.pdf]

## **Supplementary data**

### **Storage stability**

Storage stability of  $\beta$ C-NLs and  $\beta$ C-GNLs was monitored by measuring retention rate, size, ZP and PDI. Storage stability was accessed at two different temperatures (refrigerated storage: 4 °C and room temperature: 25 °C) for 28 days (Figure 3). After 7 days of storage the retention rate (RR) of  $\beta$ C in NLs reduced from  $81\pm 5\%$  to  $76\pm 3$  and from  $81\pm 5$  to  $61\pm 1.7\%$  at 4°C and 25°C, respectively. However, in  $\beta$ C-GNLs retention rate (RR) reduced by only 2% from  $92\pm 6.1$  to  $90\pm 1.9$  % at 4°C and  $92\pm 6.1$  to  $89\pm 0.94$  at 25°C respectively (Figure 3-A). After 28-days storage at 4 °C or 25 °C, the retention rate of  $\beta$ C in  $\beta$ C-NLs decreased to about  $36\pm 1.4\%$  and  $32\pm 1.1\%$  respectively. While in GNLs, the retention rate of  $\beta$ C at 4°C was  $76\pm 5\%$ . Even at higher temperature (25 °C)  $65\pm 2.2\%$  of  $\beta$ C was retained by GNLs. Overall, the retention rate of  $\beta$ C in all systems was lower at the higher storage temperature, which was in accordance with the known impact of temperature on  $\beta$ C<sup>38</sup>. However, this effect was significantly less in GNLs than NLs. Another reason behind the lower RR of  $\beta$ C-NLs could be the weak noncovalent interaction between  $\beta$ C and phospholipids bilayer, due to this weak interaction  $\beta$ C is more prone to leakage from liposomal vesicles. Our results suggest that coating with beta-glucan on NLs improves the RR% of encapsulated carotene by 50% under both storage temperatures and this coating provides stability against degradation and rapid leakage of the encapsulated agent. The average size, ZP and PDI of the samples were also measured, and the results are presented in Figures 3-B, C and D. The particle size of uncoated NLs increased to  $478\pm 11$ nm and  $449\pm 8$ nm after 28 days at 25 and 4°C, respectively. This increase in size indicates the aggregation of the NLs during storage<sup>60</sup>. Additionally, an increase in PDI values of  $\beta$ C-NLs at both temperatures to 0.4, even after one week of storage also indicates the presence of non-homogeneous particle size distribution. On the other hand, after 4 weeks the size of glucan-coated NLs changed from  $179\pm 2$ nm to  $337\pm 11$ nm at 4°C and to  $394\pm 6$ nm at 25°C. PDI of  $\beta$ C-GNLs whether stored at 4 °C or 25 °C, remain  $<0.3$  indicating that the vesicles could keep uniform particle size distribution even after 28 days of storage. A continuous decrease in Zeta potential (ZP) values of both coated and uncoated NLs was observed, however, ZP values of GNLs remained above  $\pm 30$ mV throughout the storage period. All these results showed that  $\beta$ -glucan ( $\beta$ G) modification is beneficial to the stability of NL storage. Similar

results were observed previously where the author suggests that coating with different polymers improves the stability of  $\beta$ C loaded liposomes <sup>61</sup>.

Figure S1. Storage stability study of beta-glucan coated ( $\beta$ C-GNLs) and uncoated nanoliposomes ( $\beta$ C-NLs) at 4 °C and 25 °C under dark (A) retention rate, (B) Size, (C) Zeta potential, and (D) Polydispersity index. Values are the means  $\pm$  SD (n = 6). Open circle and square represent 25°C, close circle and square 4°C, purple color for uncoated while pink represents the dietary fiber (DF) coated liposomes.

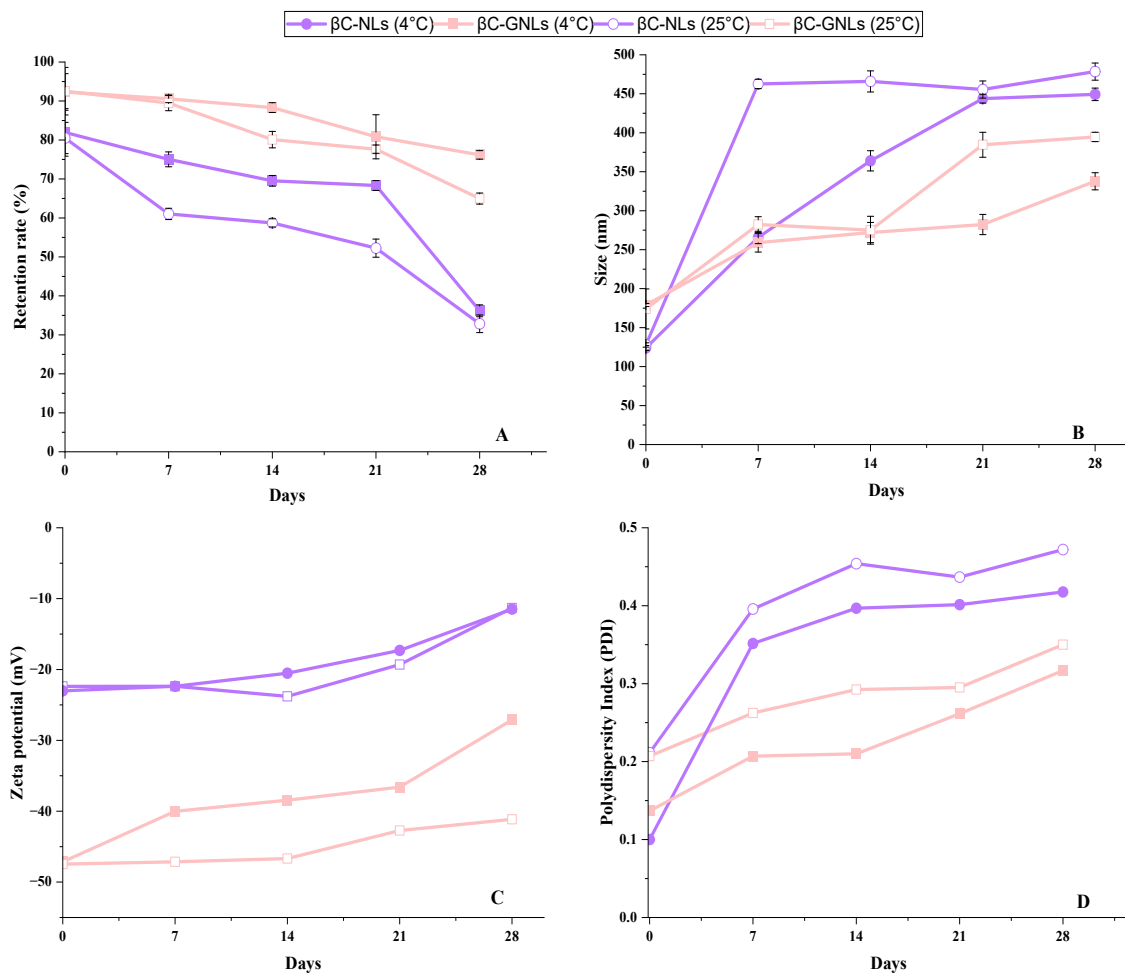

Figure S2: DLS data for beta glucan coated nanoliposomes with different concentration of beta glucan. ) 0.1%  $\beta$ G (A), 0.3%  $\beta$ G (B) and 0.5%  $\beta$ G (C).

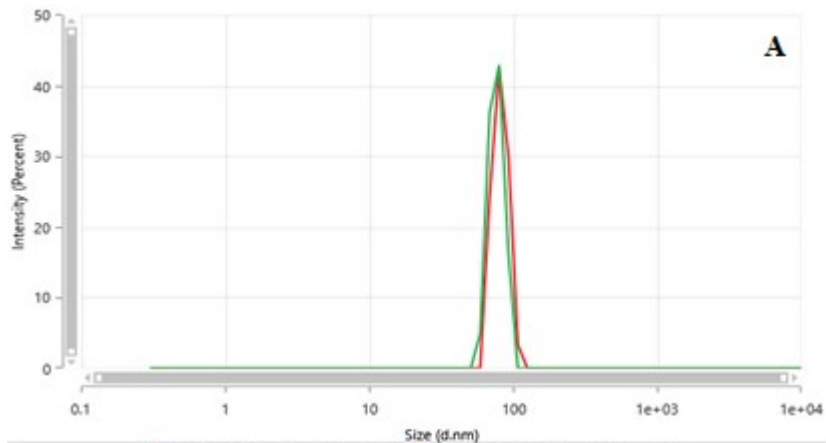

| Name           | Mean  | Standard Deviation | RSD  | Minimum | Maximum |
|----------------|-------|--------------------|------|---------|---------|
| Z Average Mean | 249   | 12.6               | 5.04 | 240     | 258     |
| Polydispersity | 0.363 | 0.0306             | 8.41 | 0.342   | 0.385   |
| Peak One Mean  | 79.4  | 3.6                | 4.53 | 76.9    | 82      |
| Peak One Area  | 100   | 0                  | 0    | 100     | 100     |

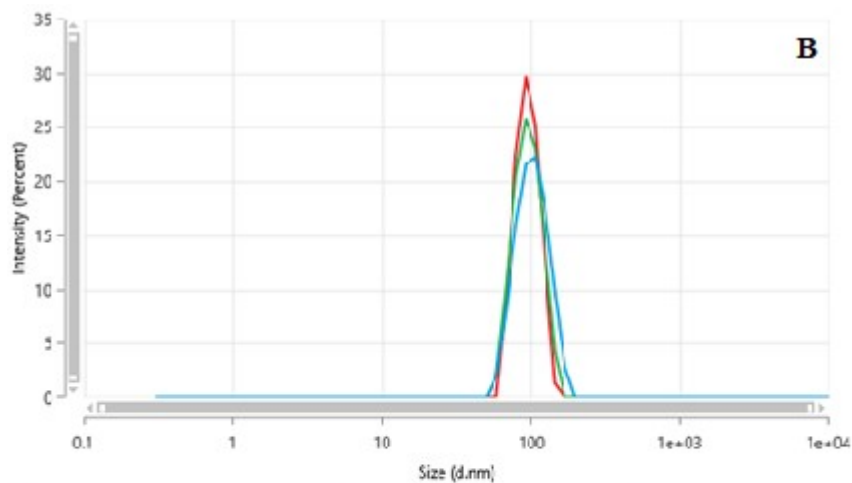

| Name           | Mean  | Standard Deviation | RSD  | Minimum | Maximum |
|----------------|-------|--------------------|------|---------|---------|
| Z Average Mean | 155   | 21.8               | 14.1 | 133     | 177     |
| Polydispersity | 0.288 | 0.0352             | 12.2 | 0.253   | 0.323   |
| Peak One Mean  | 99.5  | 4.57               | 4.59 | 96.4    | 105     |
| Peak One Area  | 100   | 0                  | 0    | 100     | 100     |

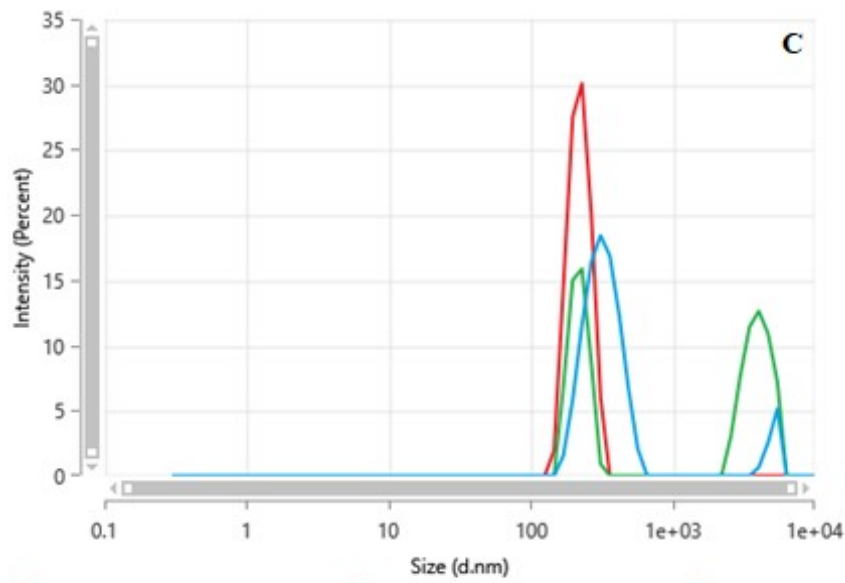

■ 0.5% BG coated lipo [Steady state] ■ 0.5% BG coated lipo [Steady state] ■ 0.5% BG coated

| Name           | Mean     | Standard Deviation | RSD  | Minimum | Maximum  |
|----------------|----------|--------------------|------|---------|----------|
| Z Average Mean | 429      | 30                 | 6.98 | 400     | 460      |
| Polydispersity | 0.563    | 0.186              | 33   | 0.451   | 0.778    |
| Peak One Mean  | 1.52E+03 | 2.16E+03           | 142  | 223     | 4.01E+03 |
| Peak One Area  | 81.5     | 252                | 30.9 | 52.8    | 100      |
| Peak Two Mean  | 2.67E+03 | 3.47E+03           | 130  | 219     | 5.12E+03 |
| Peak Two Area  | 27.8     | 27.5               | 98.9 | 8.35    | 47.2     |
